# Supplementary material
Source: PubMed Central journal article supplement (PMC4731107)
Supplement: ASN.2014090894_ASN2014090894SupplementaryData.pdf [file ASN.2014090894_ASN2014090894SupplementaryData.pdf]

### SUPPLEMENTAL MATERIAL 1: Study Flow Diagram

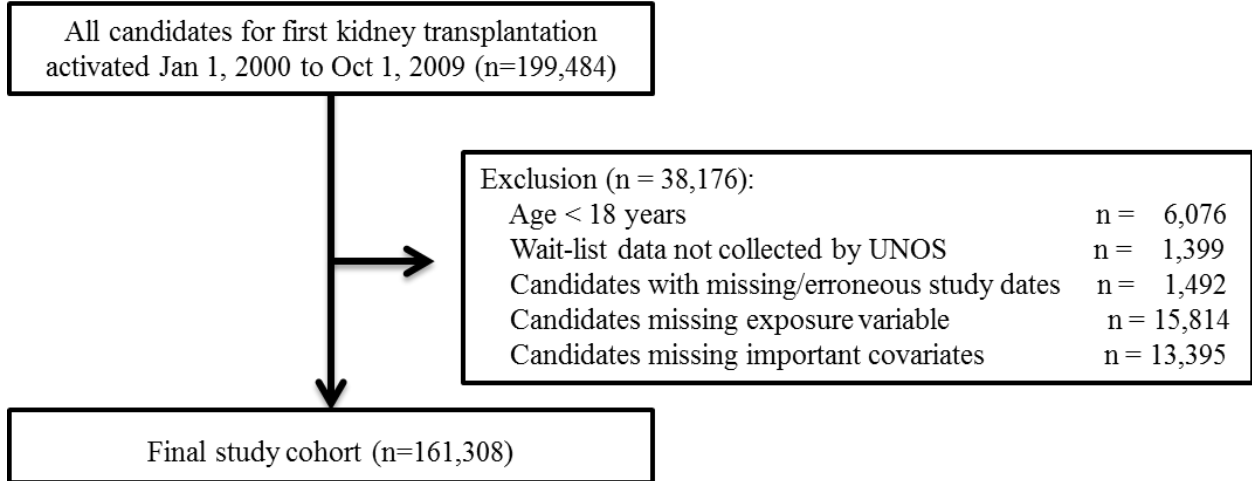

**SUPPLEMENTAL MATERIAL 2: Distribution of the Number of PRA Measurements among Study Participants and Changes in PRA from Activation to Landmark Follow-Up Time points**

| <b>PRA Category at Activation</b> | <b>Number of patients</b> | <b>Median Number of PRA Measurements (IQR)</b> | <b>Incidence Rate Ratio of PRA Measurements (95% CI)</b> |
|-----------------------------------|---------------------------|------------------------------------------------|----------------------------------------------------------|
| <b>0%</b>                         | 120,888                   | 1 (1, 2)                                       | 1                                                        |
| <b>1-19%</b>                      | 22,112                    | 2 (1, 4)                                       | 1.94 (1.92, 1.97)                                        |
| <b>20-79%</b>                     | 13,000                    | 3 (2, 6)                                       | 2.25 (2.22, 2.29)                                        |
| <b>80-100%</b>                    | 5,308                     | 3 (2, 6)                                       | 2.02 (1.97, 2.07)                                        |
| <b>Total</b>                      | 161,308                   | 2 (1, 3)                                       |                                                          |

Abbreviations: CI, confidence interval; IQR, interquartile range

| <b>PRA Category at Activation</b> | <b>Number of patients*</b> | <b>Median (IQR) of delta PRA<sup>o</sup> 3 months post-activation</b> | <b>Number of patients*</b> | <b>Median (IQR) of delta PRA<sup>o</sup> 6 months post-activation</b> | <b>Number of patients*</b> | <b>Median (IQR) of delta PRA<sup>o</sup> 12 months post-activation</b> |
|-----------------------------------|----------------------------|-----------------------------------------------------------------------|----------------------------|-----------------------------------------------------------------------|----------------------------|------------------------------------------------------------------------|
| <b>0%</b>                         | 4,169                      | 0 (0, 4)                                                              | 2,499                      | 2 (0, 11)                                                             | 1,509                      | 3 (0, 17)                                                              |
| <b>1-19%</b>                      | 2,032                      | 0 (-3, 3)                                                             | 1,575                      | 0 (-3, 6)                                                             | 919                        | 0 (-3, 6)                                                              |
| <b>20-79%</b>                     | 1,588                      | 0 (-14, 8)                                                            | 1,210                      | 0 (-16, 10)                                                           | 736                        | -1 (-17, 12)                                                           |
| <b>80-100%</b>                    | 526                        | 0 (-12, 1)                                                            | 415                        | -2 (-18, 1)                                                           | 264                        | -4 (-23, 1)                                                            |
| <b>Total</b>                      | 8,315                      | 0 (0, 4)                                                              | 5,699                      | 0 (-1, 8)                                                             | 3,428                      | 1 (-1, 11)                                                             |

\*Number of patients in the subcohort of patients who were activated after 2007 who had PRA measurements at landmark time points (3, 6, 12 months) following activation

<sup>o</sup>Delta PRA is the difference in PRA measured at landmark time points vs. activation

Abbreviations: CI, confidence interval; IQR, interquartile range

**SUPPLEMENTAL MATERIAL 3: Extended Kaplan-Meier Failure Curves of All-Cause Mortality and Cardiovascular Mortality among Waitlisted Kidney Transplant Candidates over Entire Follow-Up and Up To 6-Years\* following Activation**

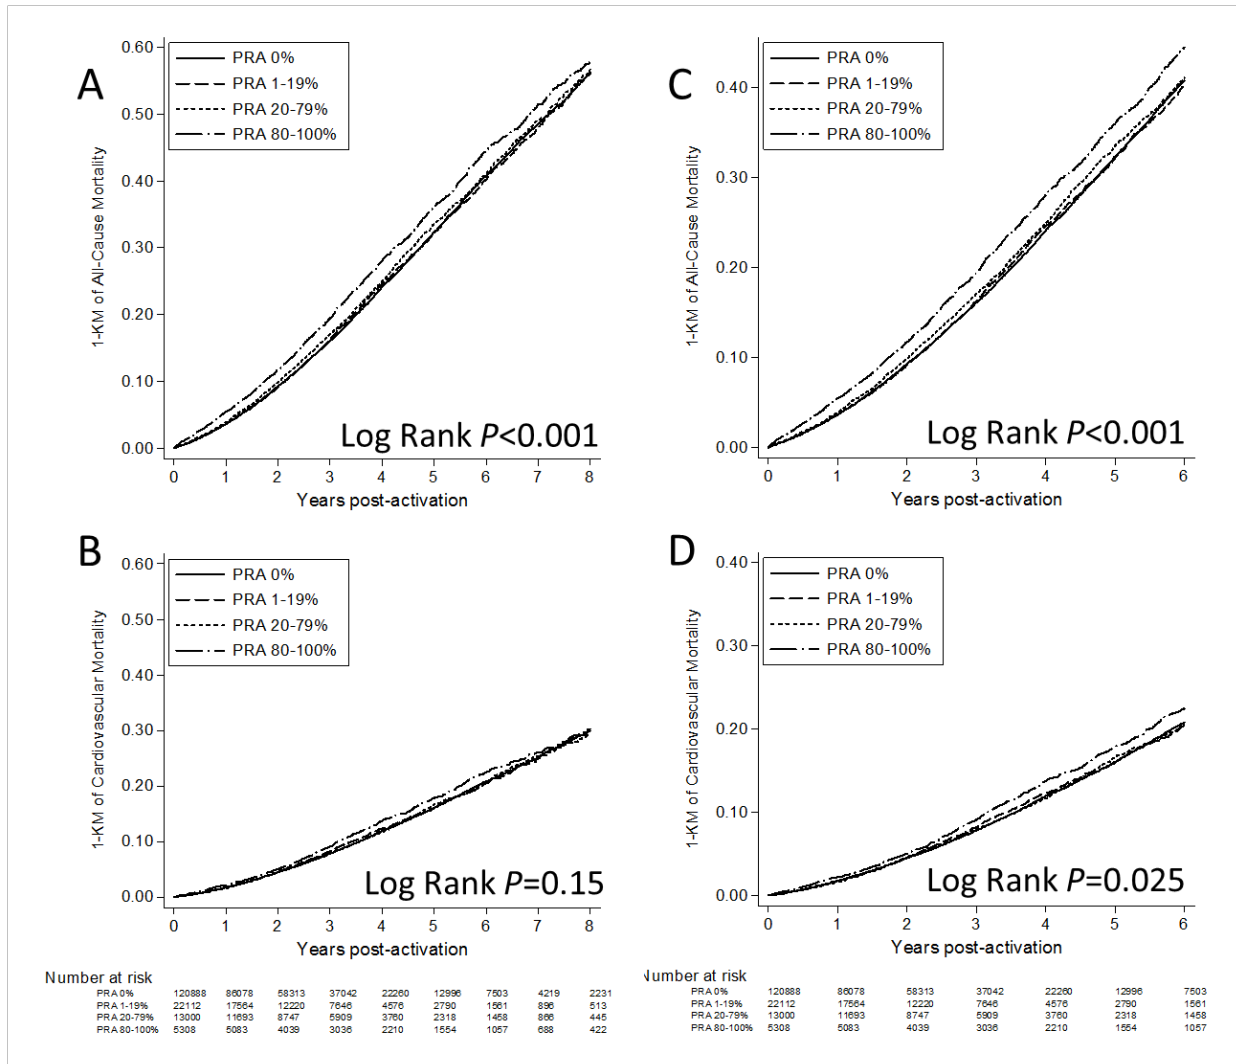

\*Follow up truncated at 6 years following activation to account for loss of information at the extremes of follow-up time, or differences in data collection/ascertainment as a function of time from wait-listing (e.g., as a consequence of removal from the waiting list)

**SUPPLEMENTAL MATERIAL 4: Association between Time-Varying PRA Category and All-Cause Mortality by Patient Subgroups**

| Subgroups of covariates                     |                  | Number of patients in subgroups | PRA 0%   | PRA 1-19%<br>HR (95% CI) | PRA 20-79%<br>HR (95% CI) | PRA 80-100%<br>HR (95% CI) | P value for interaction between PRA and covariates |
|---------------------------------------------|------------------|---------------------------------|----------|--------------------------|---------------------------|----------------------------|----------------------------------------------------|
| Transplant candidate's age (years)          | 18-34.9          | 20,458                          | referent | 1.13 [0.98, 1.32]        | 1.28 [1.08, 1.51]         | 1.37 [1.12, 1.67]          | 0.20                                               |
|                                             | 35-44.9          | 26,927                          | referent | 1.01 [0.91, 1.12]        | 1.14 [1.02, 1.27]         | 1.33 [1.17, 1.51]          |                                                    |
|                                             | 45-49.9          | 19,812                          | referent | 1.11 [1.00, 1.23]        | 1.27 [1.14, 1.42]         | 1.29 [1.13, 1.48]          |                                                    |
|                                             | 50-54.9          | 23,460                          | referent | 0.98 [0.90, 1.07]        | 1.12 [1.01, 1.23]         | 1.15 [1.02, 1.30]          |                                                    |
|                                             | 55-59.9          | 24,699                          | referent | 1.05 [0.97, 1.14]        | 1.11 [1.01, 1.21]         | 1.18 [1.05, 1.32]          |                                                    |
|                                             | 60-64.9          | 21,590                          | referent | 1.01 [0.94, 1.10]        | 1.04 [0.95, 1.14]         | 1.20 [1.07, 1.34]          |                                                    |
|                                             | ≥65              | 20,458                          | referent | 0.97 [0.91, 1.04]        | 1.05 [0.97, 1.14]         | 1.13 [1.01, 1.26]          |                                                    |
| Candidate's sex                             | Male             | 96,428                          | referent | 1.04 [0.99, 1.09]        | 1.20 [1.13, 1.29]         | 1.43 [1.28, 1.59]          | <0.001                                             |
|                                             | Female           | 64,880                          | referent | 0.99 [0.93, 1.04]        | 1.06 [1.01, 1.11]         | 1.15 [1.09, 1.21]          |                                                    |
| Candidate's Race                            | White            | 75,140                          | referent | 1.03 [0.97, 1.08]        | 1.10 [1.04, 1.17]         | 1.17 [1.08, 1.26]          | 0.64                                               |
|                                             | Black            | 48,076                          | referent | 1.01 [0.95, 1.07]        | 1.11 [1.01, 1.22]         | 1.22 [1.13, 1.32]          |                                                    |
|                                             | Hispanic         | 25,589                          | referent | 1.02 [0.94, 1.11]        | 1.03 [0.85, 1.23]         | 1.30 [1.15, 1.46]          |                                                    |
|                                             | Asian            | 9,255                           | referent | 0.97 [0.84, 1.13]        | 1.28 [1.00, 1.63]         | 1.23 [0.97, 1.56]          |                                                    |
|                                             | Other            | 3,248                           | referent | 1.28 [1.02, 1.61]        | 1.22 [1.13, 1.32]         | 1.08 [0.80, 1.45]          |                                                    |
| Cause of End Stage Renal Disease            | GN               | 30,624                          | referent | 1.09 [0.98, 1.21]        | 1.18 [1.06, 1.32]         | 1.28 [1.12, 1.46]          | 0.33                                               |
|                                             | DM               | 53,133                          | referent | 1.02 [0.97, 1.07]        | 1.11 [1.05, 1.18]         | 1.14 [1.06, 1.22]          |                                                    |
|                                             | PKD              | 12,951                          | referent | 0.93 [0.77, 1.13]        | 1.11 [0.91, 1.36]         | 1.40 [1.09, 1.81]          |                                                    |
|                                             | HTN              | 38,585                          | referent | 1.01 [0.94, 1.08]        | 1.11 [1.02, 1.20]         | 1.18 [1.07, 1.31]          |                                                    |
|                                             | Other            | 26,015                          | referent | 1.02 [0.93, 1.12]        | 1.08 [0.98, 1.19]         | 1.38 [1.22, 1.55]          |                                                    |
| Dialysis prior to activation                | HD               | 96,907                          | referent | 1.03 [0.99, 1.07]        | 1.12 [1.07, 1.18]         | 1.19 [1.12, 1.26]          | 0.01                                               |
|                                             | PD               | 16,910                          | referent | 0.99 [0.90, 1.10]        | 1.02 [0.91, 1.14]         | 1.03 [0.89, 1.19]          |                                                    |
|                                             | No dialysis      | 39,104                          | referent | 0.96 [0.87, 1.05]        | 1.13 [1.01, 1.26]         | 1.46 [1.27, 1.68]          |                                                    |
|                                             | Modality unknown | 8,387                           | referent | 1.17 [1.00, 1.38]        | 1.17 [0.98, 1.40]         | 1.49 [1.17, 1.89]          |                                                    |
| Time from dialysis initiation to activation | Preemptive       | 43,650                          | referent | 0.96 [0.88, 1.04]        | 1.20 [1.10, 1.32]         | 1.41 [1.26, 1.59]          | 0.02                                               |
|                                             | <12 months       | 54,999                          | referent | 1.00 [0.94, 1.07]        | 1.12 [1.05, 1.20]         | 1.15 [1.05, 1.25]          |                                                    |
|                                             | 1 to 2 years     | 32,037                          | referent | 1.09 [1.02, 1.17]        | 1.06 [0.98, 1.14]         | 1.26 [1.15, 1.39]          |                                                    |
|                                             | 2 to 3 years     | 13,646                          | referent | 1.03 [0.94, 1.14]        | 1.12 [1.00, 1.24]         | 1.13 [0.98, 1.29]          |                                                    |

|                                           |           |         |          |                   |                   |                   |       |
|-------------------------------------------|-----------|---------|----------|-------------------|-------------------|-------------------|-------|
|                                           | >3 years  | 16,976  | referent | 1.00 [0.92, 1.09] | 1.09 [0.99, 1.20] | 1.14 [1.02, 1.27] |       |
| Activation era                            | 2000-2003 | 54,486  | referent | 1.03 [0.98, 1.08] | 1.20 [1.13, 1.26] | 1.17 [1.09, 1.26] | 0.003 |
|                                           | 2004-2006 | 52,238  | referent | 1.00 [0.94, 1.06] | 1.04 [0.98, 1.11] | 1.18 [1.08, 1.28] |       |
|                                           | 2007-2009 | 54,584  | referent | 1.05 [0.98, 1.14] | 1.07 [0.98, 1.17] | 1.37 [1.23, 1.53] |       |
| Diabetes Mellitus at activation           | No        | 95,292  | referent | 1.01 [0.95, 1.06] | 1.11 [1.05, 1.18] | 1.30 [1.21, 1.39] | 0.05  |
|                                           | Yes       | 66,016  | referent | 1.03 [0.99, 1.08] | 1.11 [1.06, 1.17] | 1.14 [1.07, 1.22] |       |
| Peripheral vascular disease at Activation | No        | 152,909 | referent | 1.03 [1.00, 1.07] | 1.11 [1.07, 1.17] | 1.22 [1.16, 1.29] | 0.14  |
|                                           | Yes       | 8,399   | referent | 0.93 [0.83, 1.04] | 1.10 [0.98, 1.25] | 1.05 [0.89, 1.24] |       |

Abbreviations: HR, hazard ratio; CI, confidence interval; PVD, peripheral vascular disease; GN, glomerulonephritis; DM, diabetes mellitus, PKD, polycystic kidney disease, HTN, hypertensive nephropathy; HD, hemodialysis; PD, peritoneal dialysis

**SUPPLEMENTAL MATERIAL 5: Association between Time-Varying PRA Category and Cardiovascular Mortality by Patient Subgroups**

| Subgroups of covariates                     |                  | Number of patients in subgroups | PRA 0%   | PRA 1-19%         | PRA 20-79%        | PRA 80-100%       | P value for interaction between PRA and covariates |
|---------------------------------------------|------------------|---------------------------------|----------|-------------------|-------------------|-------------------|----------------------------------------------------|
|                                             |                  |                                 |          | HR (95% CI)       | HR (95% CI)       | HR (95% CI)       |                                                    |
| Transplant candidate's age (years)          | 18-34-9          | 20,458                          | referent | 1.15 [0.91, 1.45] | 1.34 [1.03, 1.73] | 1.45 [1.07, 1.98] | 0.06                                               |
|                                             | 35-44-9          | 26,927                          | referent | 1.25 [1.08, 1.45] | 1.17 [0.99, 1.38] | 1.49 [1.24, 1.80] |                                                    |
|                                             | 45-49-9          | 19,812                          | referent | 1.09 [0.94, 1.28] | 1.35 [1.15, 1.58] | 1.26 [1.02, 1.55] |                                                    |
|                                             | 50-54-9          | 23,460                          | referent | 1.03 [0.90, 1.17] | 1.15 [1.00, 1.33] | 1.13 [0.93, 1.37] |                                                    |
|                                             | 55-59-9          | 24,699                          | referent | 1.06 [0.94, 1.19] | 1.12 [0.98, 1.28] | 1.17 [0.98, 1.40] |                                                    |
|                                             | 60-64-9          | 21,590                          | referent | 1.01 [0.89, 1.13] | 1.05 [0.92, 1.21] | 1.16 [0.97, 1.38] |                                                    |
|                                             | ≥65              | 20,458                          | referent | 0.96 [0.86, 1.07] | 0.94 [0.82, 1.07] | 1.11 [0.94, 1.31] |                                                    |
| Candidate's sex                             | Male             | 96,428                          | referent | 1.06 [1.00, 1.13] | 1.17 [1.06, 1.29] | 1.45 [1.23, 1.71] | 0.06                                               |
|                                             | Female           | 64,880                          | referent | 1.02 [0.94, 1.11] | 1.07 [0.99, 1.15] | 1.15 [1.06, 1.25] |                                                    |
| Candidate's Race                            | White            | 75,140                          | referent | 1.06 [0.99, 1.15] | 1.08 [0.98, 1.19] | 1.14 [1.01, 1.28] | 0.38                                               |
|                                             | Black            | 48,076                          | referent | 1.06 [0.97, 1.16] | 1.15 [1.05, 1.26] | 1.33 [1.19, 1.49] |                                                    |
|                                             | Hispanic         | 25,589                          | referent | 0.97 [0.86, 1.09] | 1.09 [0.95, 1.26] | 1.18 [0.98, 1.42] |                                                    |
|                                             | Asian            | 9,255                           | referent | 0.99 [0.80, 1.23] | 0.97 [0.73, 1.28] | 0.93 [0.62, 1.40] |                                                    |
|                                             | Other            | 3,248                           | referent | 1.38 [0.99, 1.91] | 1.44 [1.02, 2.04] | 1.24 [0.81, 1.90] |                                                    |
| Cause of End Stage Renal Disease            | GN               | 30,624                          | referent | 1.17 [0.99, 1.38] | 1.31 [1.10, 1.55] | 1.44 [1.17, 1.77] | 0.51                                               |
|                                             | DM               | 53,133                          | referent | 1.01 [0.94, 1.08] | 1.09 [1.00, 1.18] | 1.14 [1.02, 1.27] |                                                    |
|                                             | PKD              | 12,951                          | referent | 0.99 [0.74, 1.33] | 1.08 [0.78, 1.49] | 1.20 [0.78, 1.86] |                                                    |
|                                             | HTN              | 38,585                          | referent | 1.04 [0.93, 1.15] | 1.10 [0.97, 1.24] | 1.24 [1.07, 1.44] |                                                    |
|                                             | Other            | 26,015                          | referent | 1.17 [1.02, 1.35] | 1.10 [0.93, 1.30] | 1.29 [1.05, 1.58] |                                                    |
| Dialysis prior to activation                | HD               | 96,907                          | referent | 1.04 [0.98, 1.11] | 1.10 [1.03, 1.18] | 1.20 [1.10, 1.30] | 0.10                                               |
|                                             | PD               | 16,910                          | referent | 1.10 [0.95, 1.28] | 1.14 [0.97, 1.35] | 1.03 [0.82, 1.30] |                                                    |
|                                             | No dialysis      | 39,104                          | referent | 0.92 [0.77, 1.08] | 1.12 [0.93, 1.34] | 1.54 [1.23, 1.94] |                                                    |
|                                             | Modality unknown | 8,387                           | referent | 1.37 [1.07, 1.75] | 1.16 [0.87, 1.54] | 1.39 [0.93, 2.08] |                                                    |
| Time from dialysis initiation to activation | Preemptive       | 43,650                          | referent | 1.03 [0.91, 1.18] | 1.19 [1.02, 1.38] | 1.64 [1.37, 1.97] | 0.06                                               |
|                                             | <12 months       | 54,999                          | referent | 1.03 [0.94, 1.13] | 1.15 [1.04, 1.28] | 1.15 [1.07, 1.43] |                                                    |
|                                             | 1 to 2 years     | 32,037                          | referent | 1.04 [0.94, 1.15] | 1.07 [0.95, 1.20] | 1.24 [1.07, 1.43] |                                                    |
|                                             | 2 to 3 years     | 13,646                          | referent | 1.04 [0.90, 1.19] | 1.02 [0.86, 1.20] | 0.93 [0.74, 1.17] |                                                    |
|                                             | >3 years         | 16,976                          | referent | 1.11 [0.98, 1.26] | 1.11 [0.96, 1.27] | 1.19 [1.01, 1.41] |                                                    |
| Activation era                              | 2000-2003        | 54,486                          | referent | 1.06 [0.98, 1.13] | 1.22 [1.12, 1.32] | 1.22 [1.10, 1.36] | 0.018                                              |

|                                                  |                  |         |          |                   |                   |                   |      |
|--------------------------------------------------|------------------|---------|----------|-------------------|-------------------|-------------------|------|
|                                                  | <b>2004-2006</b> | 52,238  | referent | 0.98 [0.90, 1.07] | 0.97 [0.88, 1.08] | 1.19 [1.04, 1.35] |      |
|                                                  | <b>2007-2009</b> | 54,584  | referent | 1.16 [1.03, 1.30] | 1.11 [0.97, 1.27] | 1.23 [1.02, 1.48] |      |
| <b>Diabetes Mellitus at activation</b>           | <b>No</b>        | 95,292  | referent | 1.08 [0.99, 1.17] | 1.13 [1.03, 1.24] | 1.31 [1.17, 1.47] | 0.29 |
|                                                  | <b>Yes</b>       | 66,016  | referent | 1.03 [0.97, 1.10] | 1.10 [1.02, 1.19] | 1.15 [1.04, 1.26] |      |
| <b>Peripheral vascular disease at Activation</b> | <b>No</b>        | 152,909 | referent | 1.05 [1.00, 1.11] | 1.11 [1.05, 1.19] | 1.23 [1.14, 1.33] | 0.59 |
|                                                  | <b>Yes</b>       | 8,399   | referent | 1.03 [0.87, 1.20] | 1.08 [0.90, 1.29] | 1.03[0.81, 1.32]  |      |

Abbreviations: HR, hazard ratio; CI, confidence interval; PVD, peripheral vascular disease; GN, glomerulonephritis; DM, diabetes mellitus, PKD, polycystic kidney disease, HTN, hypertensive nephropathy; HD, hemodialysis; PD, peritoneal dialysis

**SUPPLEMENTAL MATERIAL 6: Extended Kaplan-Meier Failure Curves of All-Cause Mortality (A) and Cardiovascular Mortality (B) among Waitlisted Kidney Transplant Candidates in a Subcohort with a Low Comorbidity Risk**

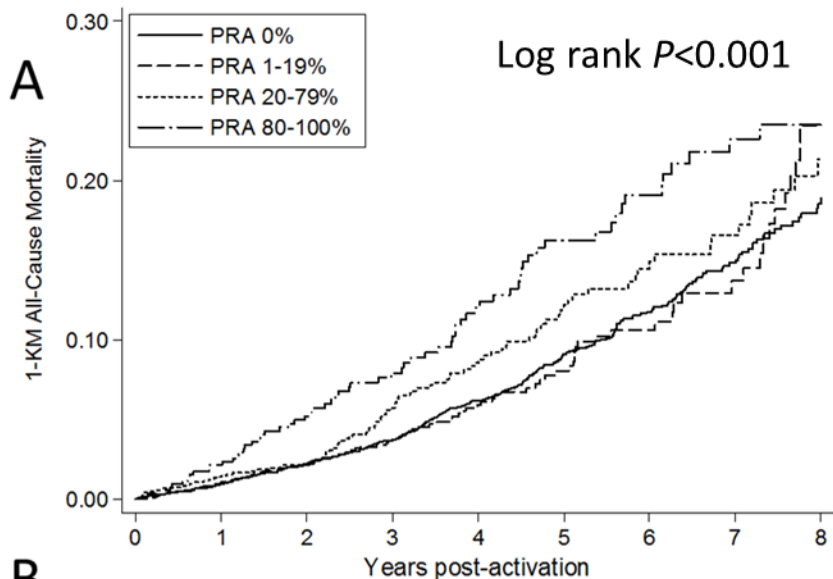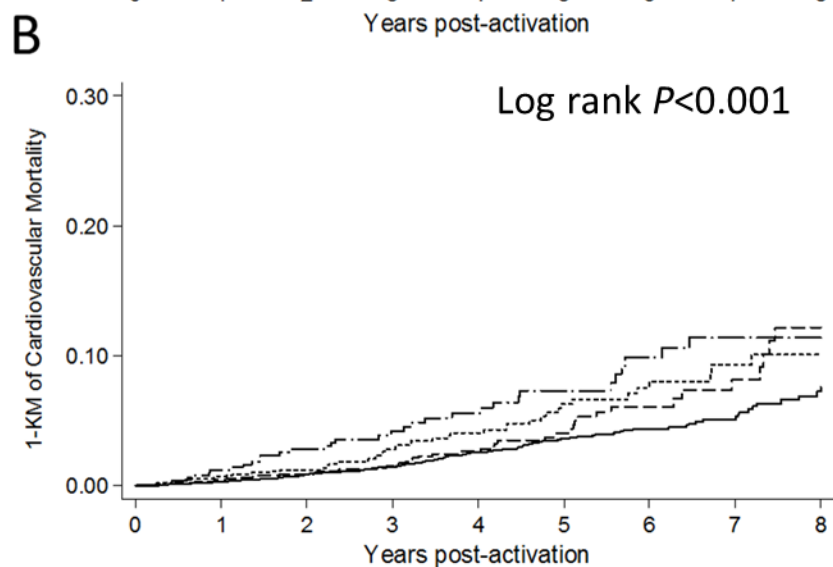

Number at risk

|             | 0     | 1    | 2    | 3    | 4    | 5    | 6   | 7   | 8   |
|-------------|-------|------|------|------|------|------|-----|-----|-----|
| PRA 0%      | 14130 | 8933 | 5976 | 3978 | 2479 | 1476 | 876 | 500 | 265 |
| PRA 1-19%   | 2581  | 1865 | 1271 | 805  | 503  | 311  | 164 | 111 | 67  |
| PRA 20-79%  | 1385  | 1121 | 894  | 642  | 421  | 280  | 191 | 129 | 72  |
| PRA 80-100% | 549   | 480  | 385  | 301  | 234  | 168  | 127 | 93  | 67  |



**SUPPLEMENTAL MATERIAL 7: All-Cause and Cardiovascular Mortality for every 10% increase in Delta PRA by 3-, 6-, and 12-months following Activation by Landmark Analyses**

| ALL-CAUSE MORTALITY      |                              |                                                                                    |                              |                                                                                    |                              |                                                                                     |
|--------------------------|------------------------------|------------------------------------------------------------------------------------|------------------------------|------------------------------------------------------------------------------------|------------------------------|-------------------------------------------------------------------------------------|
| Model                    | Number of patients* / events | HR (95% CI) per 10% increase in delta PRA <sup>◊</sup> by 3-months post-activation | Number of patients* / events | HR (95% CI) per 10% increase in delta PRA <sup>◊</sup> by 6-months post-activation | Number of patients* / events | HR (95% CI) per 10% increase in delta PRA <sup>◊</sup> by 12-months post-activation |
| 3                        | 8,315 / 890                  | 1.05 [1.02, 1.09]                                                                  | 5,699 / 579                  | 1.02 [0.99, 1.06]                                                                  | 3,428 / 347                  | 1.05 [1.01, 1.10]                                                                   |
| CARDIOVASCULAR MORTALITY |                              |                                                                                    |                              |                                                                                    |                              |                                                                                     |
| Model                    | Number of patients* / events | HR (95% CI) per 10% increase in delta PRA <sup>◊</sup> by 3-months post-activation | Number of patients* / events | HR (95% CI) per 10% increase in delta PRA <sup>◊</sup> by 6-months post-activation | Number of patients* / events | HR (95% CI) per 10% increase in delta PRA <sup>◊</sup> by 12-months post-activation |
| 3                        | 8,315 / 369                  | 1.05 [0.99, 1.10]                                                                  | 5,699 / 257                  | 1.01 [0.95, 1.07]                                                                  | 3,428 / 143                  | 1.06 [0.99, 1.13]                                                                   |

Model 3: PRA category, age, sex, race, body mass index, cause of end-stage renal disease, dialysis modality, time from dialysis initiation to activation, activation era, multi-listing, Hepatitis C

◊Delta PRA is the difference in PRA measured at landmark time points vs. activation

\*Number of patients in the subcohort of patients who were activated after 2007 who had PRA measurements at landmark time points (3, 6, 12 months) following activation

**SUPPLEMENTAL MATERIAL 8: Frequency of Candidates' Cause of Death in the Study Cohort by Scientific Registry of Transplant Recipients (SRTR) and Centers for Medicare & Medicaid Services (CMS) Data**

| CANDIDATE'S CAUSE OF DEATH | SRTR AUGMENTED BY CMS DATA |         | SRTR DATA        |         | CMS DATA         |         |
|----------------------------|----------------------------|---------|------------------|---------|------------------|---------|
|                            | NUMBER OF EVENTS           | PERCENT | NUMBER OF EVENTS | PERCENT | NUMBER OF EVENTS | PERCENT |
| Cardiovascular             | 12,792                     | 44.9%   | 4,170            | 14.6%   | 12,741           | 44.7%   |
| Infection/sepsis           | 3,280                      | 11.5%   | 1,099            | 3.9%    | 3,262            | 11.4%   |
| Malignancy                 | 806                        | 2.8%    | 273              | 1.0%    | 762              | 2.7%    |
| Hemorrhage                 | 515                        | 1.8%    | 200              | 0.7%    | 487              | 1.7%    |
| Trauma                     | 110                        | 0.4%    | 110              | 0.4%    | 0                | 0.0%    |
| Miscellaneous              | 2,724                      | 9.6%    | 797              | 2.8%    | 2,789            | 9.8%    |
| Other                      | 2,790                      | 9.8%    | 1,945            | 6.8%    | 1,239            | 4.3%    |
| Unknown/Missing            | 5,496                      | 19.3%   | 19,919           | 69.9%   | 7,233            | 25.4%   |

**SUPPLEMENTAL MATERIAL 9: Association between Time-Varying PRA Category and Cardiovascular Mortality using the Scientific Registry of Transplant Recipients (SRTR) and Centers for Medicare & Medicaid Services (CMS) data**

| <b>CARDIOVASCULAR MORTALITY (SRTR)</b> |               |                    |                    |                    |
|----------------------------------------|---------------|--------------------|--------------------|--------------------|
| <b>Models</b>                          | <b>PRA 0%</b> | <b>PRA 1-19%</b>   | <b>PRA 20-79%</b>  | <b>PRA 80-100%</b> |
|                                        |               | <b>HR (95% CI)</b> | <b>HR (95% CI)</b> | <b>HR (95% CI)</b> |
| 1                                      | Referent      | 1.01 [0.93, 1.11]  | 1.17 [1.07, 1.29]  | 1.36 [1.20, 1.53]  |
| 2                                      | Referent      | 1.06 [0.97, 1.15]  | 1.32 [1.20, 1.46]  | 1.59 [1.40, 1.81]  |
| 3                                      | Referent      | 1.04 [0.95, 1.13]  | 1.23 [1.12, 1.36]  | 1.45 [1.28, 1.65]  |
| <b>CARDIOVASCULAR MORTALITY (CMS)</b>  |               |                    |                    |                    |
| <b>Models</b>                          | <b>PRA 0%</b> | <b>PRA 1-19%</b>   | <b>PRA 20-79%</b>  | <b>PRA 80-100%</b> |
|                                        |               | <b>HR (95% CI)</b> | <b>HR (95% CI)</b> | <b>HR (95% CI)</b> |
| 1                                      | Referent      | 1.01 [0.96, 1.07]  | 1.00 [0.95, 1.06]  | 1.07 [0.99, 1.15]  |
| 2                                      | Referent      | 1.06 [1.01, 1.11]  | 1.12 [1.05, 1.18]  | 1.22 [1.13, 1.32]  |
| 3                                      | Referent      | 1.05 [1.00, 1.10]  | 1.11 [1.04, 1.18]  | 1.18 [1.10, 1.28]  |

Model 1: PRA category

Model 2: PRA category, age, sex, race, body mass index, cause of end-stage renal disease

Model 3: PRA category, age, sex, race, body mass index, cause of end-stage renal disease, dialysis modality, time from dialysis initiation to activation, activation era, multi-listing, Hepatitis C

Abbreviations: HR, Hazard ratio; CI, confidence interval
